# Supplementary material for: Metavalent bonding in chalcogenides: DFT-chemical pressure approach
Source: Royal Society of Chemistry journal article supplement (doi:10.1039/d2cp00954d), 2022-01-01
Supplement: d2cp00954d1.pdf [file d2cp00954d1.pdf]

Electronic Supplementary Information

Metavalent Bonding in Chalcogenides:  
DFT-Chemical Pressure Approach

Hussien Helmy Hassan Osman<sup>\*a,b</sup> and Francisco Javier Manjón<sup>b</sup>

<sup>a</sup> Chemistry Department, Faculty of Science, Helwan University, Ain-Helwan, 11795, Cairo, Egypt

<sup>b</sup> Instituto de Diseño para la Fabricación y Producción Automatizada, MALTA Consolider Team,

Universitat Politècnica de València, 46022 Valencia, Spain

\*Corresponding author, E-mail [hokashif@science.helwan.edu.eg](mailto:hokashif@science.helwan.edu.eg)

Table S1. Optimized crystal structures of GeSe at selected pressures.

| Structure (pressure)   | GeS-type (0 GPa)                        | GeS-type (10 GPa)                       | GeS-type (20 GPa)                       | GeS-type (30 GPa)                      | TII-type (40 GPa)                      |
|------------------------|-----------------------------------------|-----------------------------------------|-----------------------------------------|----------------------------------------|----------------------------------------|
| Lattice parameters (Å) | $a = 3.81$<br>$b = 4.30$<br>$c = 10.72$ | $a = 3.73$<br>$b = 4.05$<br>$c = 10.38$ | $a = 3.65$<br>$b = 3.82$<br>$c = 10.10$ | $a = 3.54$<br>$b = 3.71$<br>$c = 9.78$ | $a = 3.48$<br>$b = 3.63$<br>$c = 9.59$ |

Table S2. Optimized crystal structures of PbSe at selected pressures.

| Structure (pressure)   | rock-salt (0 GPa) | rock-salt (2.5 GPa) | TII-type (5.5 GPa)                      | TII-type (7.5 GPa)                      | TII-type (10 GPa)                       |
|------------------------|-------------------|---------------------|-----------------------------------------|-----------------------------------------|-----------------------------------------|
| Lattice parameters (Å) | $a = 6.08$        | $a = 5.92$          | $a = 4.35$<br>$b = 4.19$<br>$c = 11.46$ | $a = 4.29$<br>$b = 4.12$<br>$c = 11.28$ | $a = 4.22$<br>$b = 4.07$<br>$c = 11.14$ |

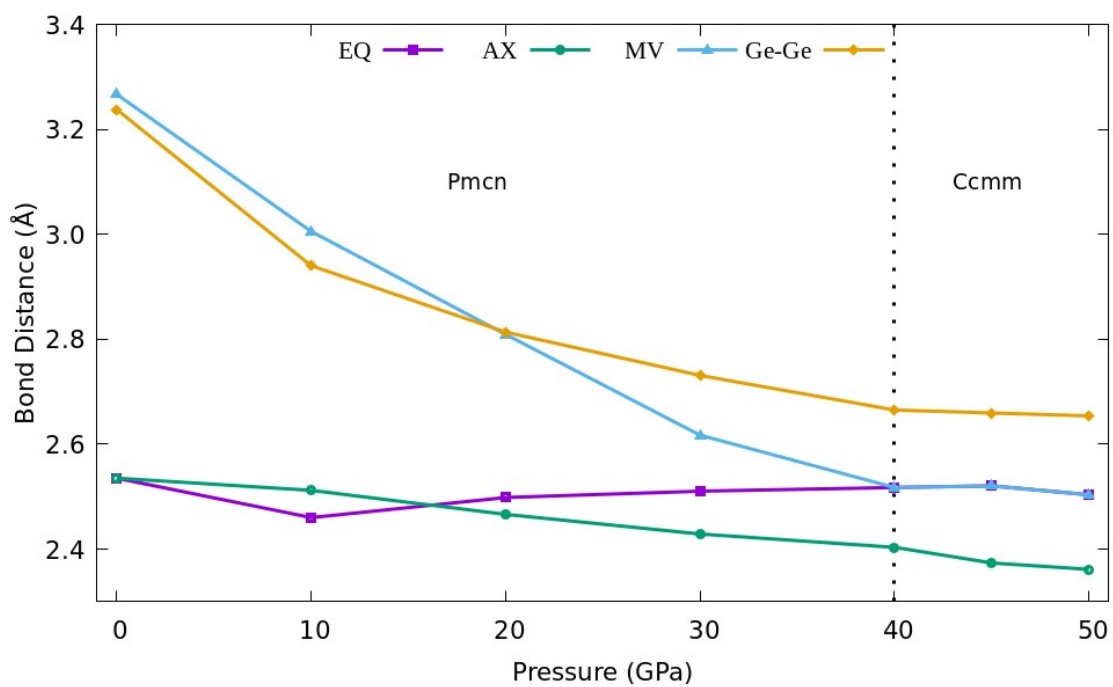

**Fig. S1** Pressure dependence of Ge-Se and Ge-Ge distances in *Pmcn* and *Ccmm* GeSe. The vertical dotted line represents the calculated phase transition pressure near 40 GPa.

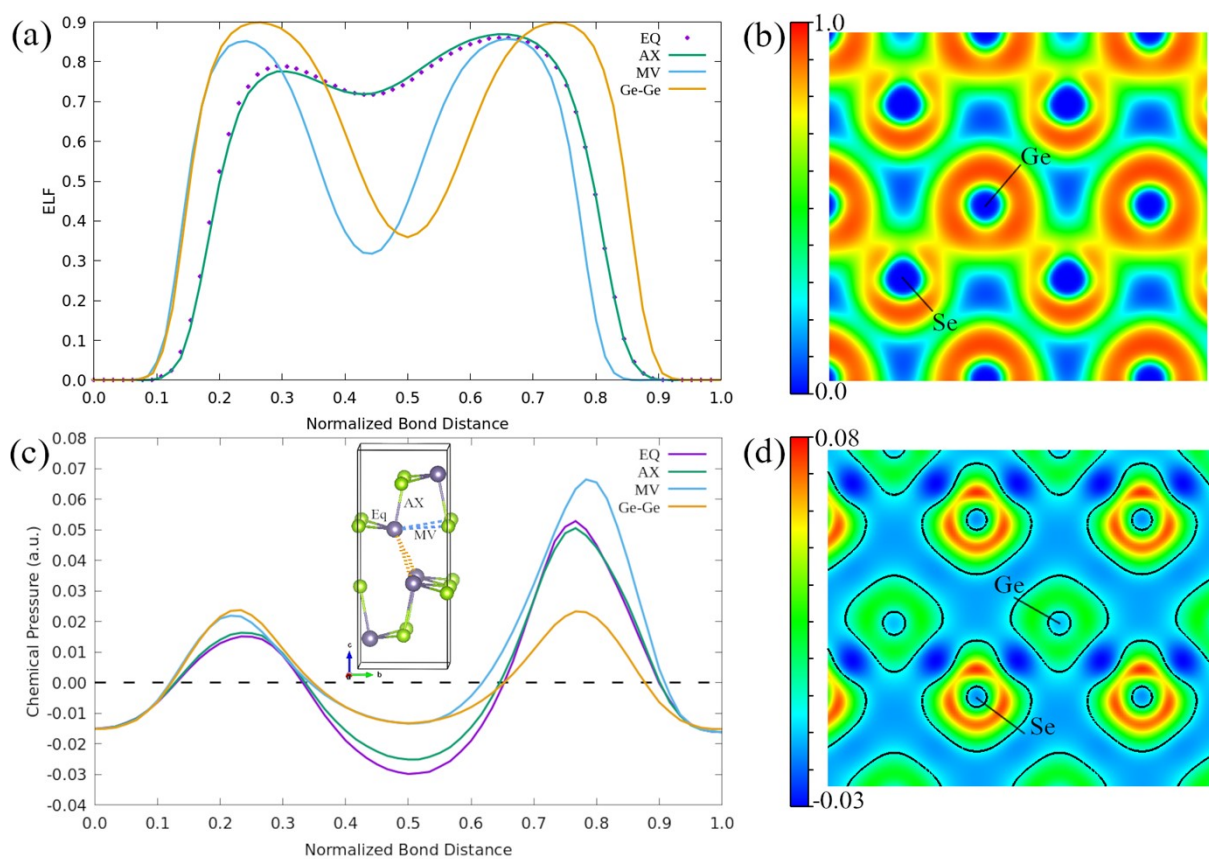

**Fig. S2** ELF and chemical pressure plots of GeSe crystal ( $Pmcn$ ) at 10 GPa. (a) 1D ELF, (b) 2D ELF, (c) 1D CP with an inset of the unit cell showing the main distances, and (d) 2D cross-section of the total CP map through the  $[001]$  plane. A black contour is shown for CP = 0.

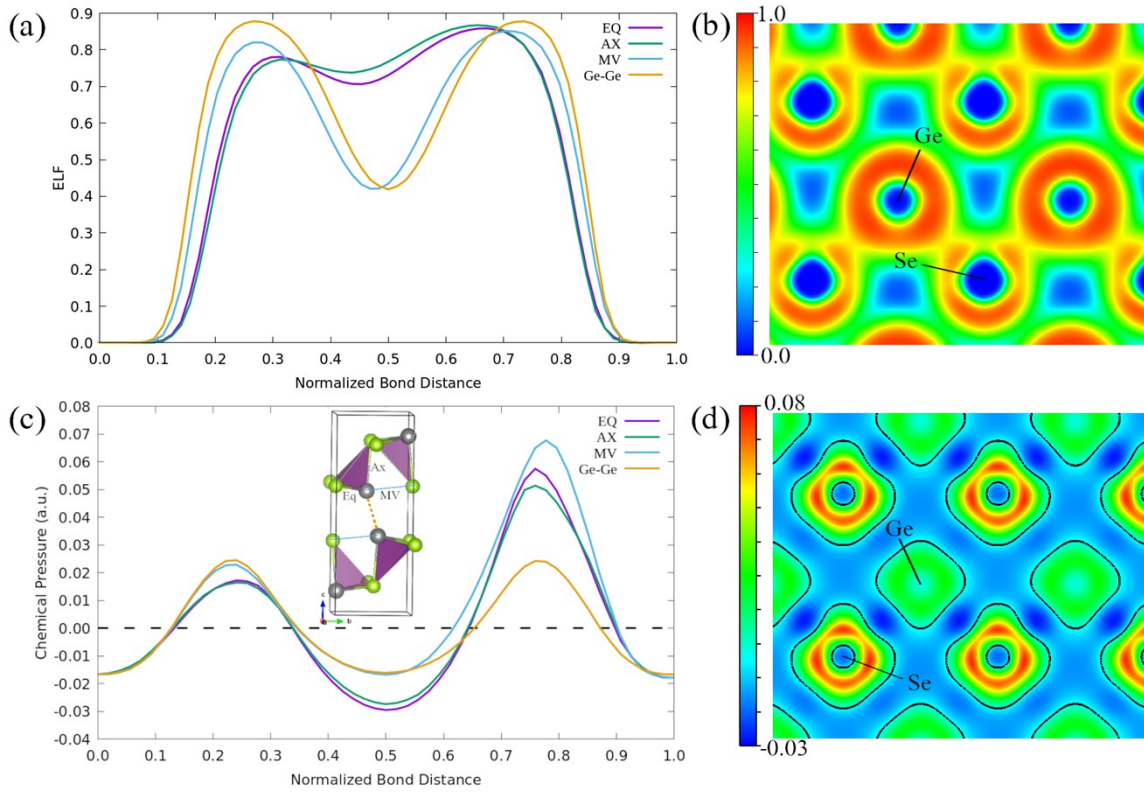

**Fig. S3** ELF and chemical pressure plots of GeSe crystal ( $Pm\bar{c}n$ ) at 20 GPa. (a) 1D ELF, (b) 2D ELF, (c) 1D CP with an inset of the unit cell showing the main distances, and (d) 2D cross-section of the total CP map through the [001] plane. A black contour is shown for CP = 0.

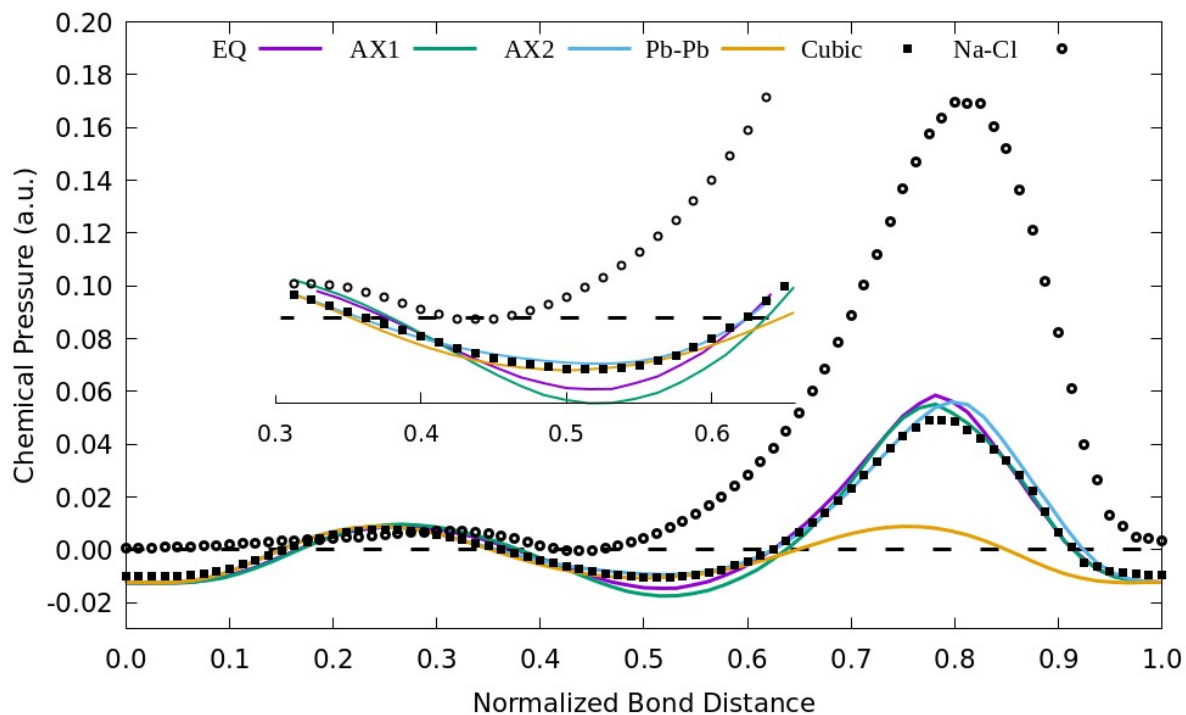

**Fig. S4** Comparison between the CP profiles of the different bonds in the orthorhombic ( $C_{mmm}$ , EQ, AX1, AX2 and Pb-Pb) and cubic ( $Fm-3m$ ) phases of PbSe and NaCl at ambient pressure.

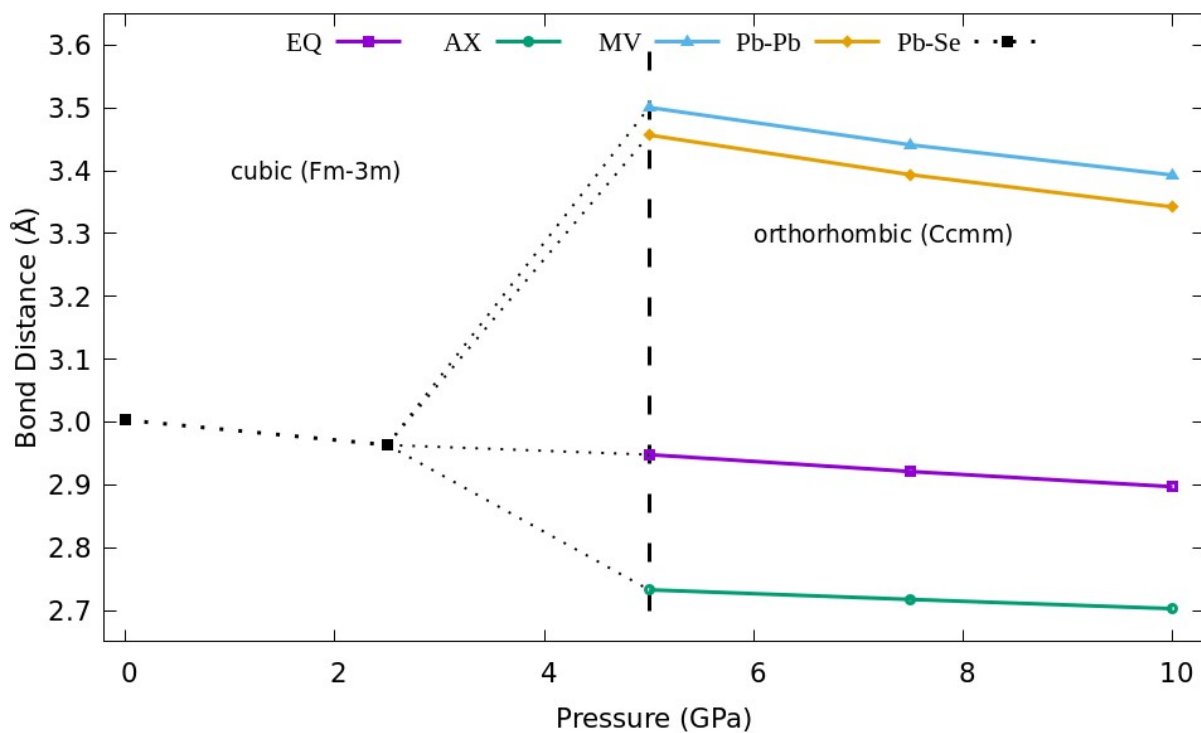

**Fig. S5** Pressure dependence of the Pb-Se in  $Fm-3m$  PbSe and Pb-Se and Pb-Pb distances in  $Ccmm$  PbSe. The vertical dashed line represents the calculated phase transition pressure at 5 GPa.
